Correction

## Correction: Phenformin enhances the therapeutic effect of selumetinib in KRAS-mutant non-small cell lung cancer irrespective of LKB1 status

Jun Zhang<sup>1,2,3</sup>, Sreenivas Nannapaneni<sup>2</sup>, Dongsheng Wang<sup>2</sup>, Fakeng Liu<sup>2</sup>, Xu Wang<sup>2</sup>, Rui Jin<sup>2</sup>, Xiuju Liu<sup>2</sup>, Mohammad Aminur Rahman<sup>2</sup>, Xianghong Peng<sup>2</sup>, Guoqing Qian<sup>2</sup>, Zhuo G. Chen<sup>2</sup>, Kwok-Kin Wong<sup>4</sup>, Fadlo R. Khuri<sup>1,2</sup>, Wei Zhou<sup>1,2</sup> and Dong M. Shin<sup>1,2</sup>

<sup>1</sup>Department of Hematology and Medical Oncology, Emory University School of Medicine, Atlanta, GA 30322, USA

<sup>2</sup>Winship Cancer Institute, Emory University School of Medicine, Atlanta, GA 30322, USA

<sup>3</sup>Division of Hematology, Oncology and Blood & Marrow Transplantation, Department of Internal Medicine, Holden Comprehensive Cancer Center, University of Iowa Carver College of Medicine, Iowa City, IA 52242, USA

<sup>4</sup>Dana-Farber Cancer Institute, Harvard Medical School, Dana Building 810B, HIM243, Boston, MA 02115, USA

**Published:**

**Copyright:** © 2021 Zhang et al. This is an open access article distributed under the terms of the [Creative Commons Attribution License](#) (CC BY 3.0), which permits unrestricted use, distribution, and reproduction in any medium, provided the original author and source are credited.

**This article has been corrected:** Due to an error in our inventory system, the pBabe-LKB1-mutant plasmid purchase from Addgene was mislabeled as K78M instead of K78I. Therefore, all the cell lines containing mutant LKB1 should be labeled K78I, not K78M, throughout this article. The authors declare that these corrections do not change the results or conclusions of this paper.

Original article: Oncotarget. 2017; 8:59008–59022. <https://doi.org/10.18632/oncotarget.19779>
